# Supplementary material for: A double quantum 129Xe NMR experiment for probing xenon in multiply-occupied cavities of solid-state inclusion compounds
Source: Royal Society of Chemistry journal article supplement (doi:10.1039/b616434j), 2007-01-01
Supplement: b616434j.pdf [file b616434j.pdf]

## Supporting Information

### **A Double Quantum $^{129}\text{Xe}$ NMR Experiment for Probing Xenon in Multiply Occupied Cavities of Solid-State Inclusion Compounds**

*Darren H. Brouwer, Saman Alavi, and John A. Ripmeester*

*Physical Chemistry Chemical Physics*

**Table S1.** Lennard-Jones interaction parameters used for Dianin's compound (4-*p*-hydroxyphenyl-2,2,4-trimethyl-chroman) and xenon guests in the MD simulations. The AMBER force field atom types for the atoms of the compound are given. The intermolecular potential parameters between unlike atoms are determined from standard combination rules.

| Atom (assignment)       | $s_{ii}^0$ (Å) | $e_{ii}^0$ (kcal/mol) |
|-------------------------|----------------|-----------------------|
| OH (hydroxyl oxygen)    | 3.0665         | 0.2104                |
| OS (ether oxygen)       | 3.0000         | 0.7128                |
| C3 (alkyl carbons)      | 3.3997         | 0.1094                |
| CA (aromatic carbons)   | 3.3997         | 0.0860                |
| HC (alkyl hydrogens)    | 2.6494         | 0.0157                |
| HA (aromatic hydrogens) | 2.5996         | 0.0150                |
| Xe                      | 4.0990         | 1.8480                |

**Table S2.** Cartesian coordinates (from X-ray structure analysis) and electrostatic point charges determined from CHELPG calculations at the HF/6-31G\* level for Dianin's compound.

| Atom | Cartesian coordinates (Å) | CHELPG charges ( <i>e</i> ) |
|------|---------------------------|-----------------------------|
| H    | -0.773 2.680 11.000       | 0.438817                    |
| O    | 0.126 2.764 10.704        | -0.657397                   |
| O    | -1.180 6.097 4.088        | -0.598939                   |
| C    | 0.200 3.740 9.732         | 0.466222                    |
| C    | 1.409 4.066 9.126         | -0.265853                   |
| C    | 1.447 5.023 8.135         | -0.119218                   |
| C    | 0.293 5.690 7.690         | -0.079688                   |
| C    | -0.903 5.354 8.343        | -0.011125                   |
| C    | -0.948 4.406 9.339        | -0.386271                   |
| C    | 0.379 6.699 6.549         | 0.528714                    |
| C    | 0.938 6.073 5.258         | -0.346496                   |
| C    | -0.040 5.243 4.446        | 0.855634                    |
| C    | -1.658 6.950 5.046        | 0.399179                    |
| C    | -0.982 7.308 6.215        | -0.229518                   |
| C    | -1.584 8.248 7.056        | -0.033620                   |
| C    | -2.811 8.824 6.753        | -0.213864                   |
| C    | -3.465 8.448 5.591        | -0.055530                   |
| C    | -2.900 7.542 4.725        | -0.279596                   |
| C    | -0.577 4.014 5.150        | -0.304210                   |

|   |        |       |       |           |
|---|--------|-------|-------|-----------|
| C | 0.578  | 4.875 | 3.115 | -0.448283 |
| C | 1.355  | 7.839 | 6.956 | -0.465786 |
| H | 2.324  | 3.557 | 9.437 | 0.162460  |
| H | 2.392  | 5.266 | 7.678 | 0.132127  |
| H | -1.797 | 5.874 | 8.082 | 0.074718  |
| H | -1.892 | 4.166 | 9.819 | 0.159561  |
| H | 1.297  | 6.880 | 4.631 | 0.059247  |
| H | 1.797  | 5.453 | 5.854 | 0.022817  |
| H | -1.094 | 8.542 | 7.995 | 0.076860  |
| H | -3.283 | 9.572 | 7.438 | 0.122090  |
| H | -4.432 | 8.893 | 5.374 | 0.107283  |
| H | -3.405 | 7.302 | 3.790 | 0.159057  |
| H | -1.135 | 3.417 | 4.533 | 0.088767  |
| H | -1.257 | 4.376 | 5.920 | 0.039978  |
| H | 0.324  | 3.510 | 5.592 | 0.017328  |
| H | 1.486  | 4.259 | 3.288 | 0.062264  |
| H | 0.865  | 5.570 | 2.490 | 0.151320  |
| H | -0.270 | 4.212 | 2.643 | 0.067197  |
| H | 1.581  | 8.402 | 6.182 | 0.136813  |
| H | 1.081  | 8.519 | 7.831 | 0.099152  |
| H | 2.256  | 7.278 | 7.263 | 0.067787  |
